# Supplementary material
Source: PubMed Central journal article supplement (PMC3488883)

## Supplemental Figure 1. Lymphocyte Functional Assays

A. Mitogenic Stimulation. Splenocytes were stimulated in vitro with the mitogen concanavalin A (ConA). Cells were plated at  $2.5 \times 10^5$  and  $3.5 \times 10^5$  cells/well. Only data from the studies using  $3.5 \times 10^5$  cells/well are shown. The stimulation index is the result of dividing the counts per minute (cpm) of  $^3\text{H}$ -thymidine incorporated into ConA-stimulated cells by cpm of  $^3\text{H}$ -thymidine incorporated into un-stimulated cells (Mean $\pm$ SEM).

B. IgM production after Pneumovax 23 vaccination. Pre-immune blood samples were collected immediately prior to pneumovax vaccination. Mice were euthanized 8 days later and post-immune blood samples were harvested. Plates coated with Pneumovax 23 were used to determine the change in serum IgM concentration (absorbance) before and after vaccination by ELISA

S1A.

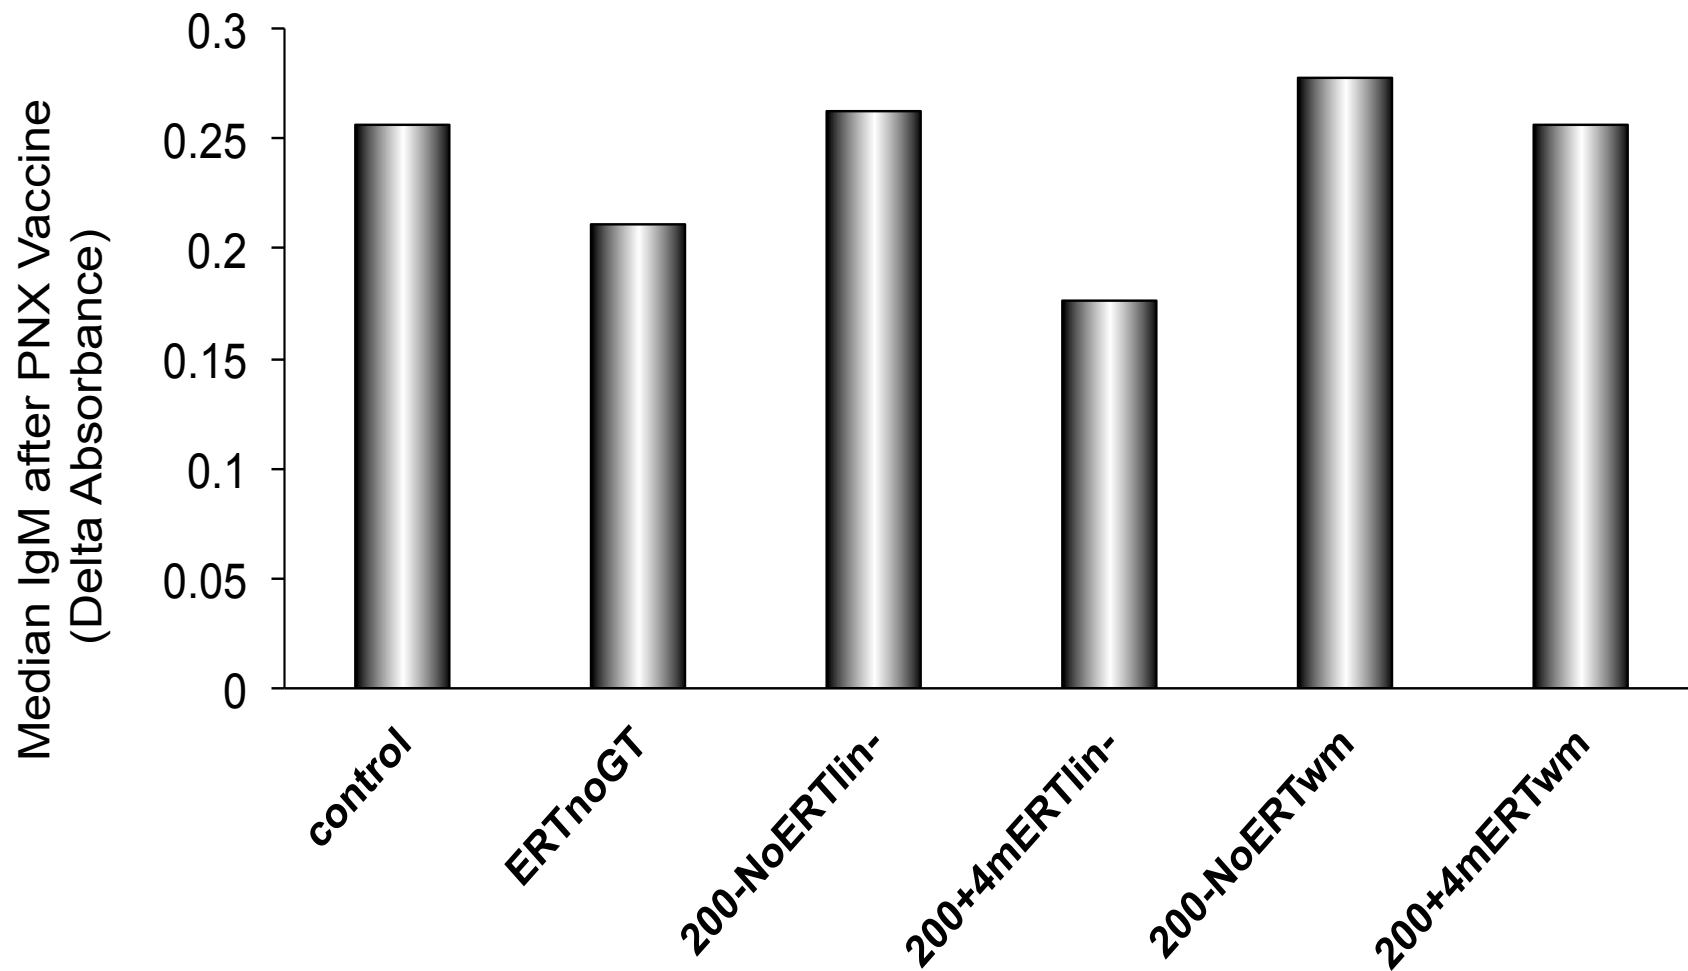

S1B.

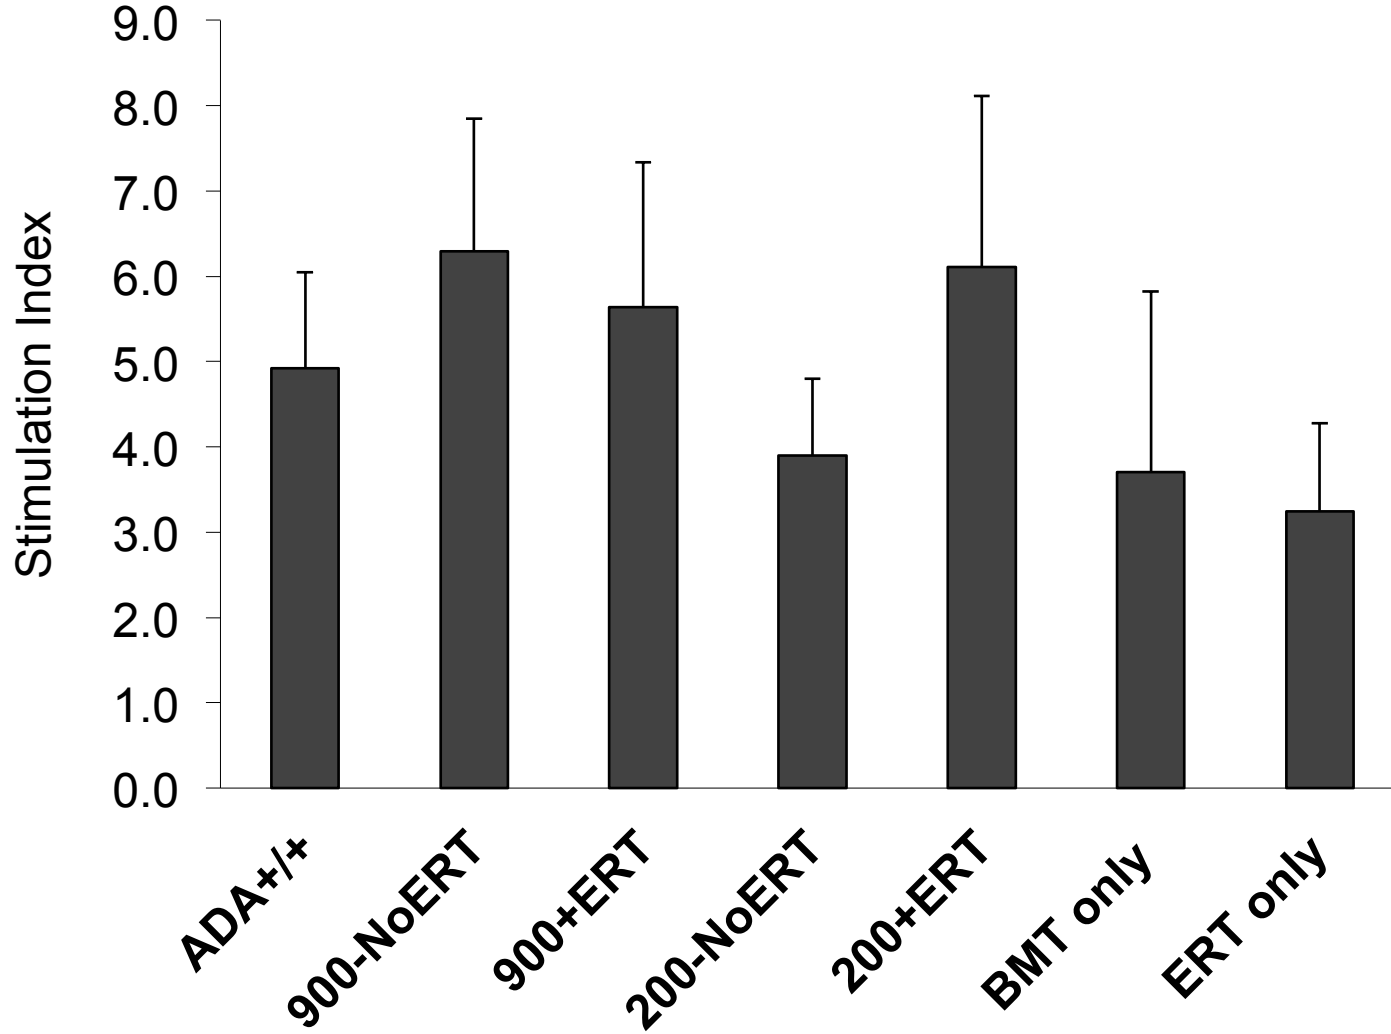

Supplemental Figure 2. Absolute numbers of cells and gene-marked cells with short course ERT after GT and transplantation of whole marrow.

A. Absolute numbers of thymocytes and thymocytes subpopulations (CD4+, CD8+, CD4+CD8+ and CD4-CD8-)(Mean+/-SEM). \*Significantly higher at 4w than at 2w (p-values<0.05).

B. Absolute numbers of splenocytes and subpopulations of B-cells (CD19+), T-cells (CD4+, CD8+)(Mean+/-SEM).

C. Absolute numbers of gene-marked thymocytes and thymocytes subpopulations (CD4+, CD8+, CD4+CD8+ and CD4-CD8-)(Mean+/-SEM). \*Significantly lower at 4w than at 2w (p-values<0.05).

D. Absolute numbers of gene-marked splenocytes and subpopulations of B-cells (CD19+), T-cells (CD4+, CD8+)(Mean+/-SEM).

S2A.

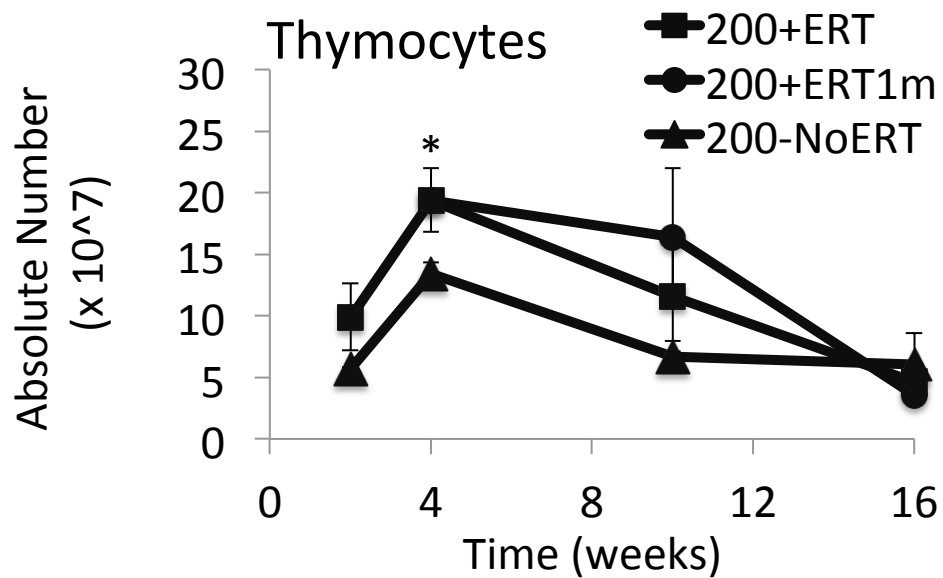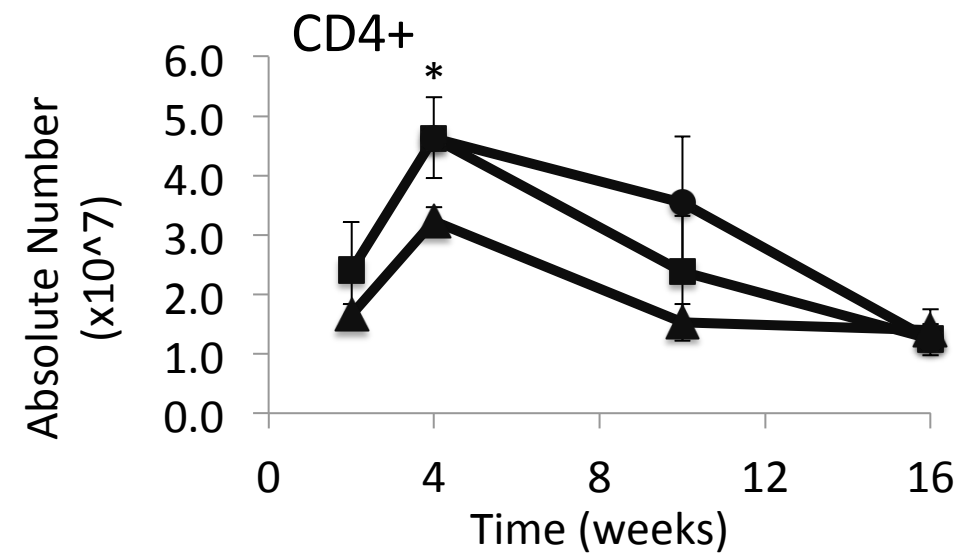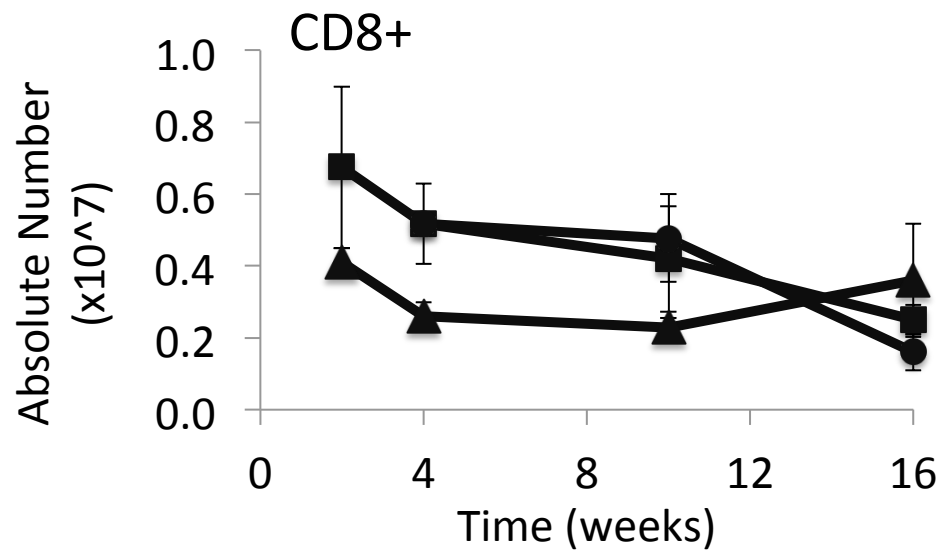

S2B.

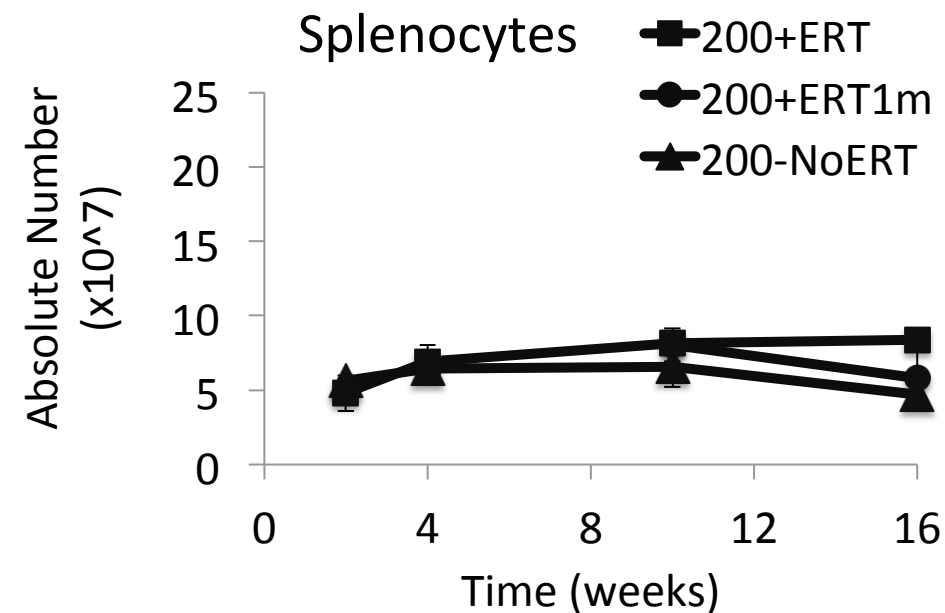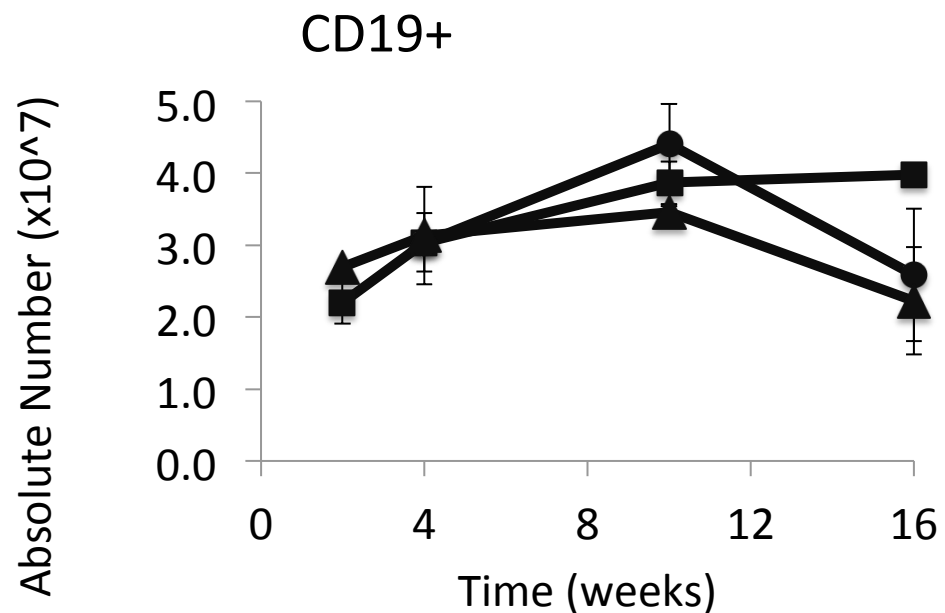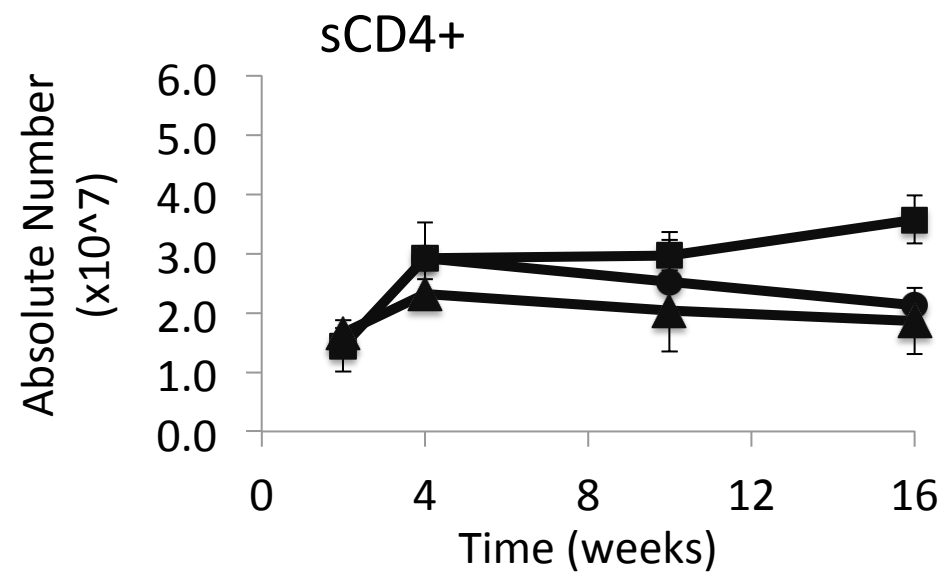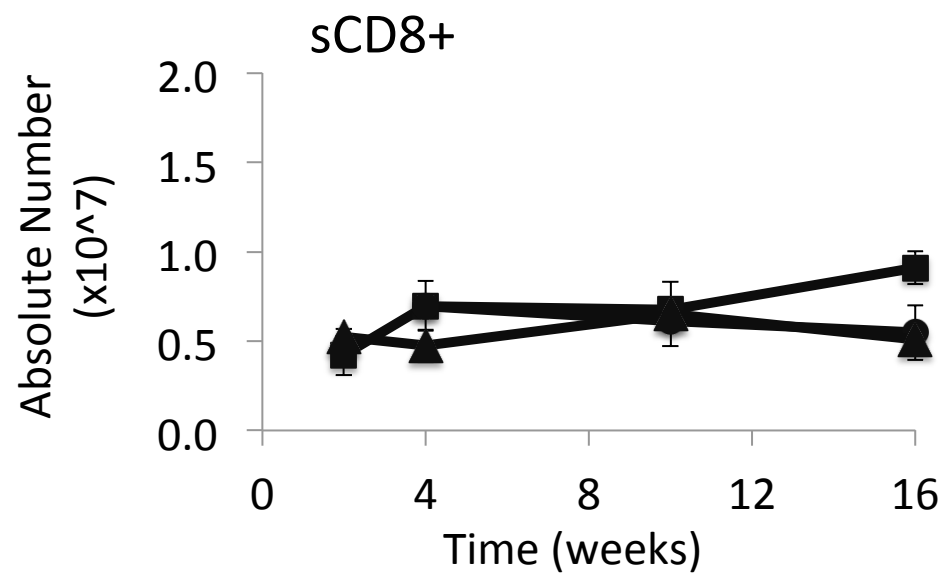

S2C.

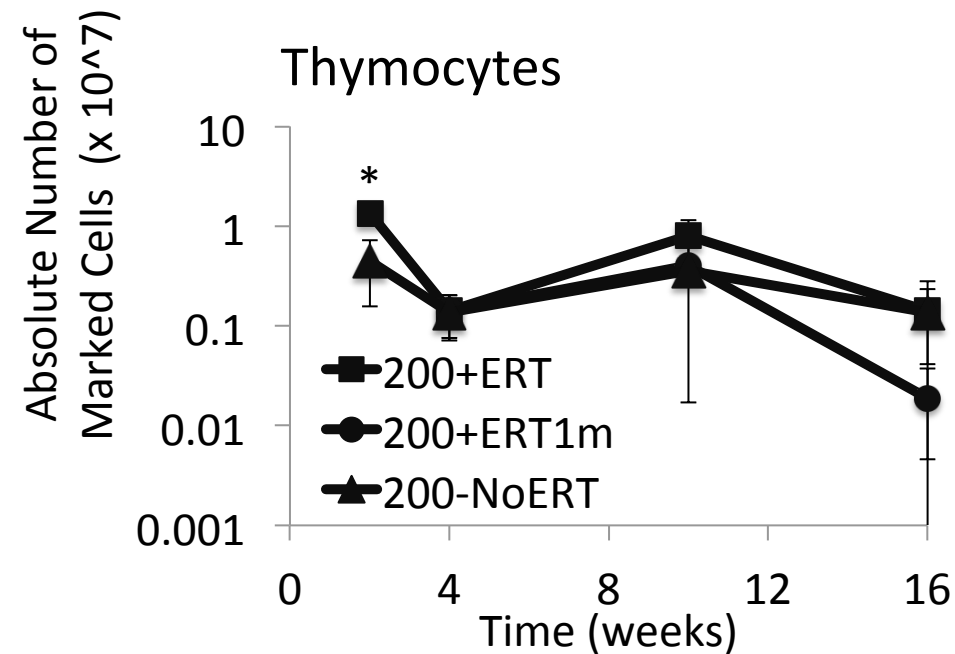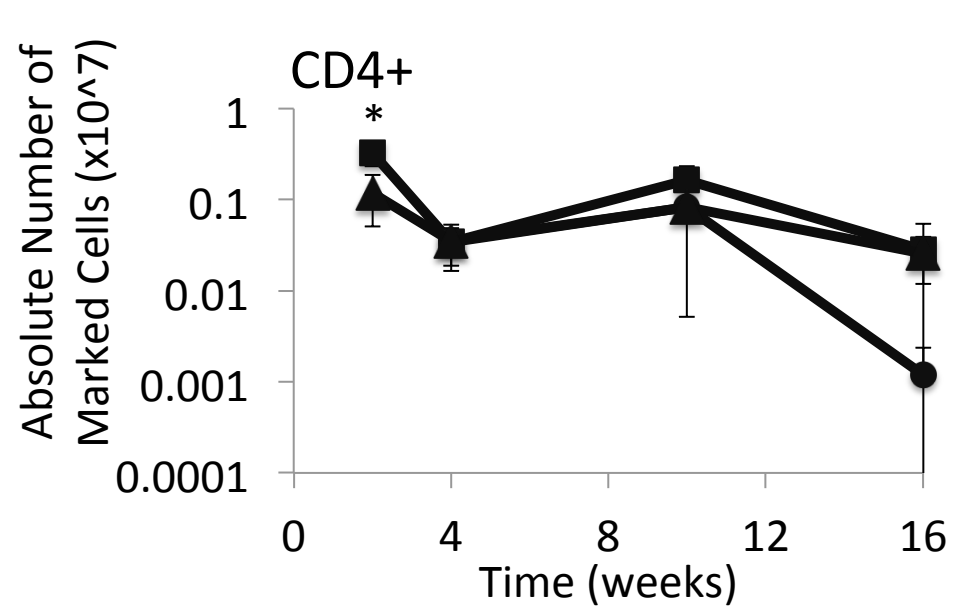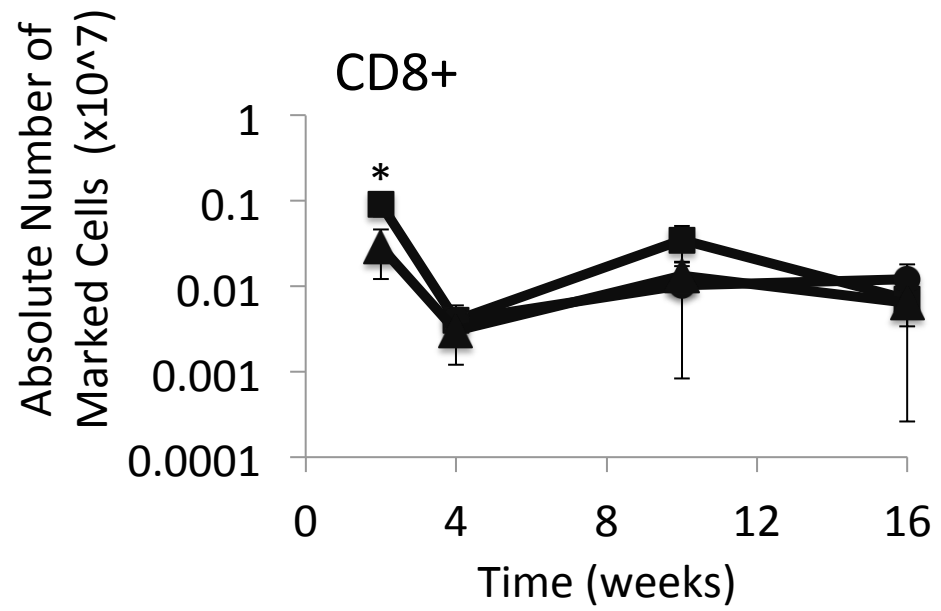

S2D.

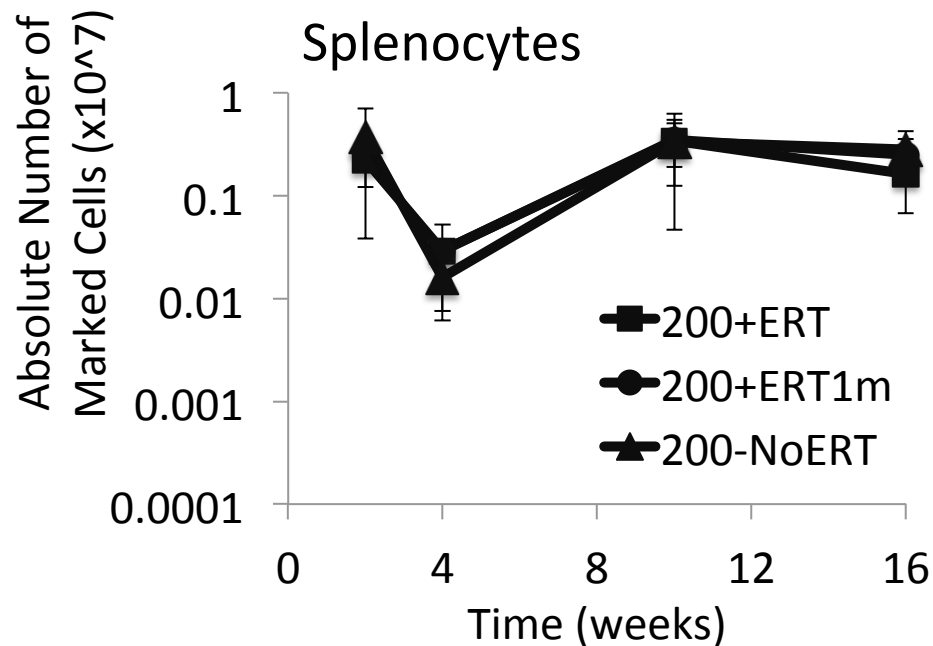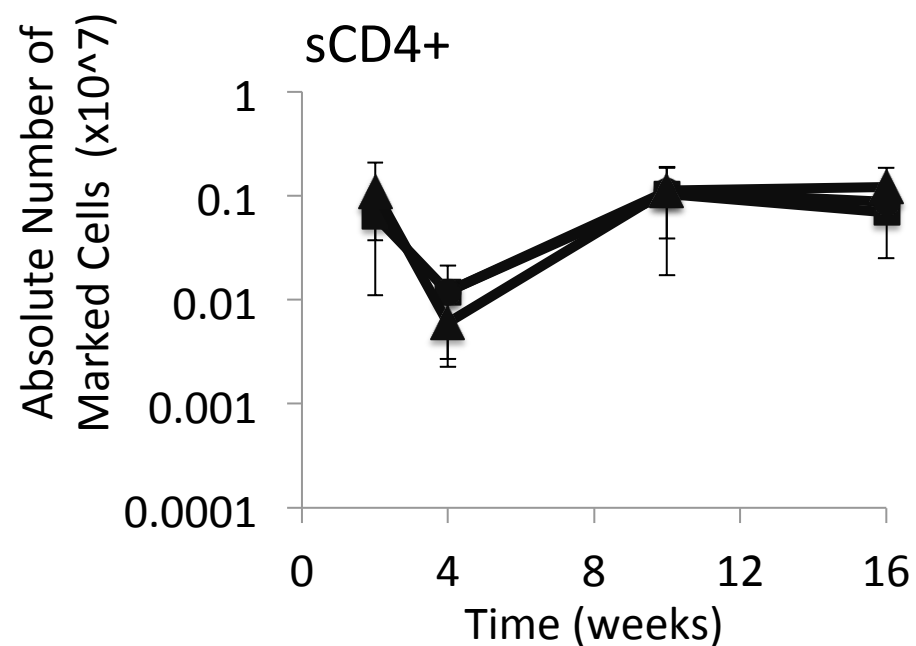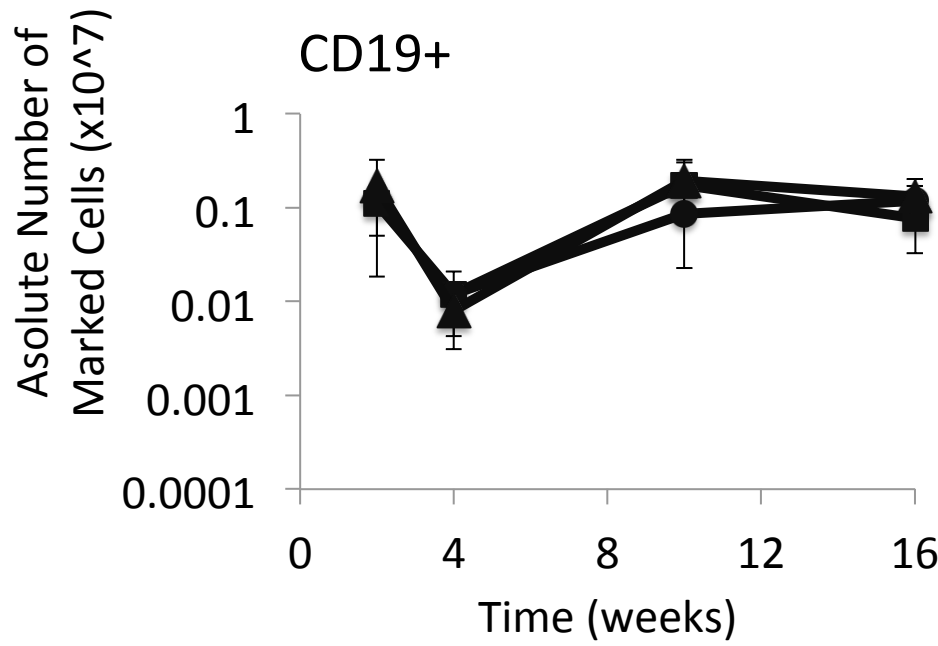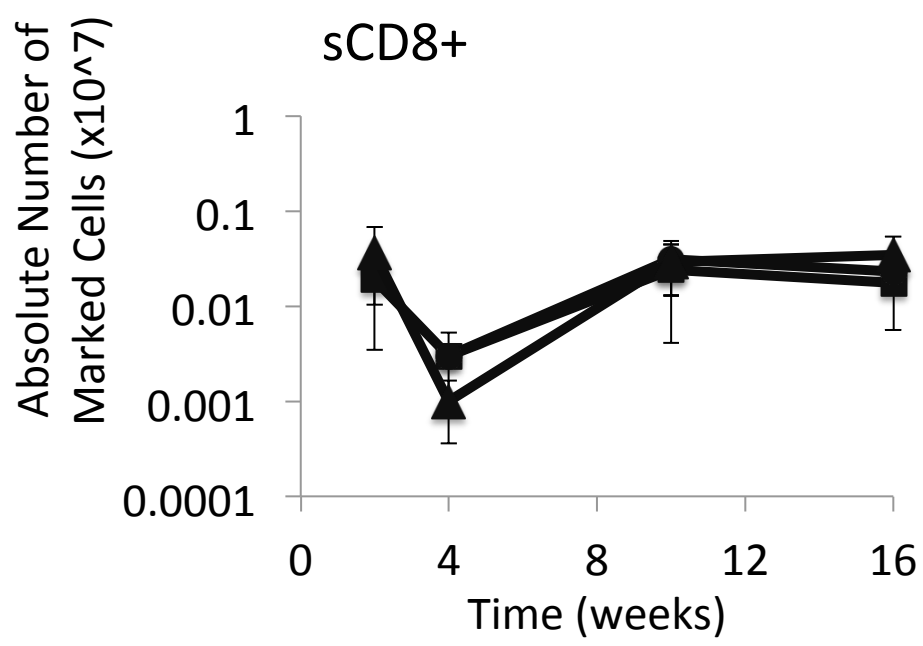

Supplement: supp_blood-2012-02-408591_blood-2012-02-408591-1.pdf [file supp_blood-2012-02-408591_blood-2012-02-408591-1.pdf]
